# Supplementary material for: Identifying an lncRNA-Related ceRNA Network to Reveal Novel Targets for a Cutaneous Squamous Cell Carcinoma
Source: MDPI journal article supplement (doi:10.3390/biology10050432), 2021-05-13
Supplement: s1 [file s1]

Article

# Identifying an lncRNA-Related ceRNA Network to Reveal Novel Targets for a Cutaneous Squamous Cell Carcinoma

Yaqin Xu, Yingying Dong, Yunhua Deng, Qianrong Qi, Mi Wu, Hongmei Liang, Qiuyun She and Qing Guo

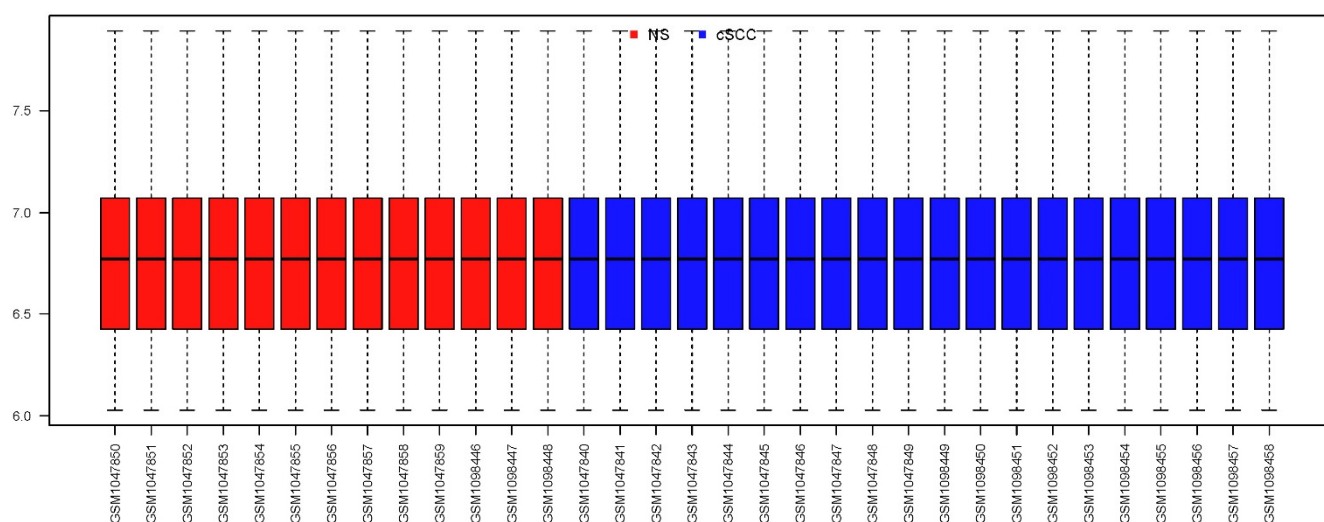

a

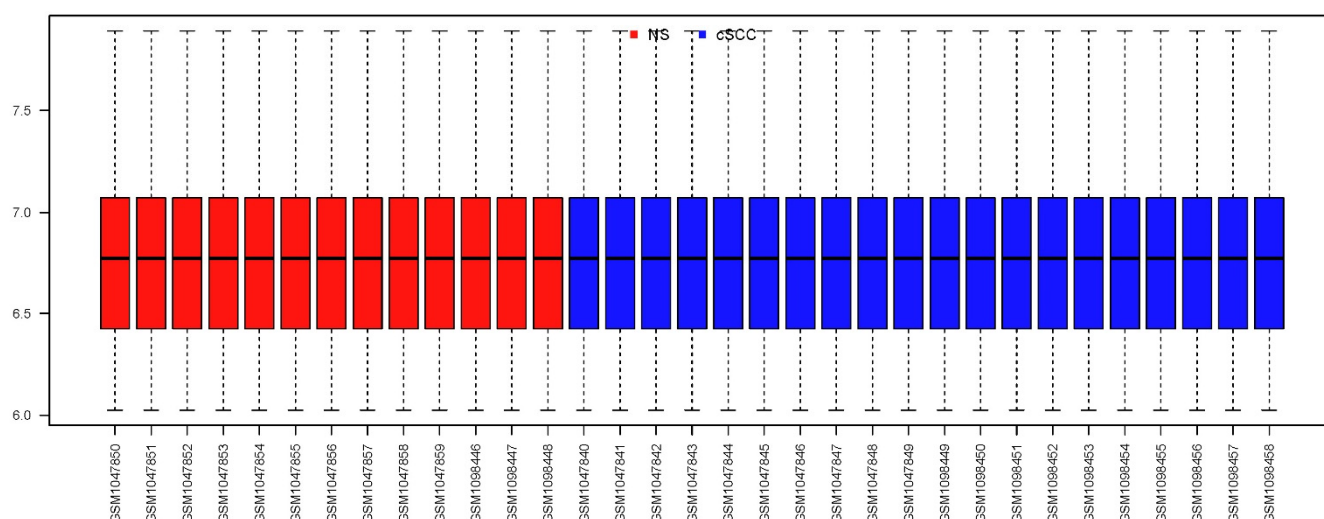

b

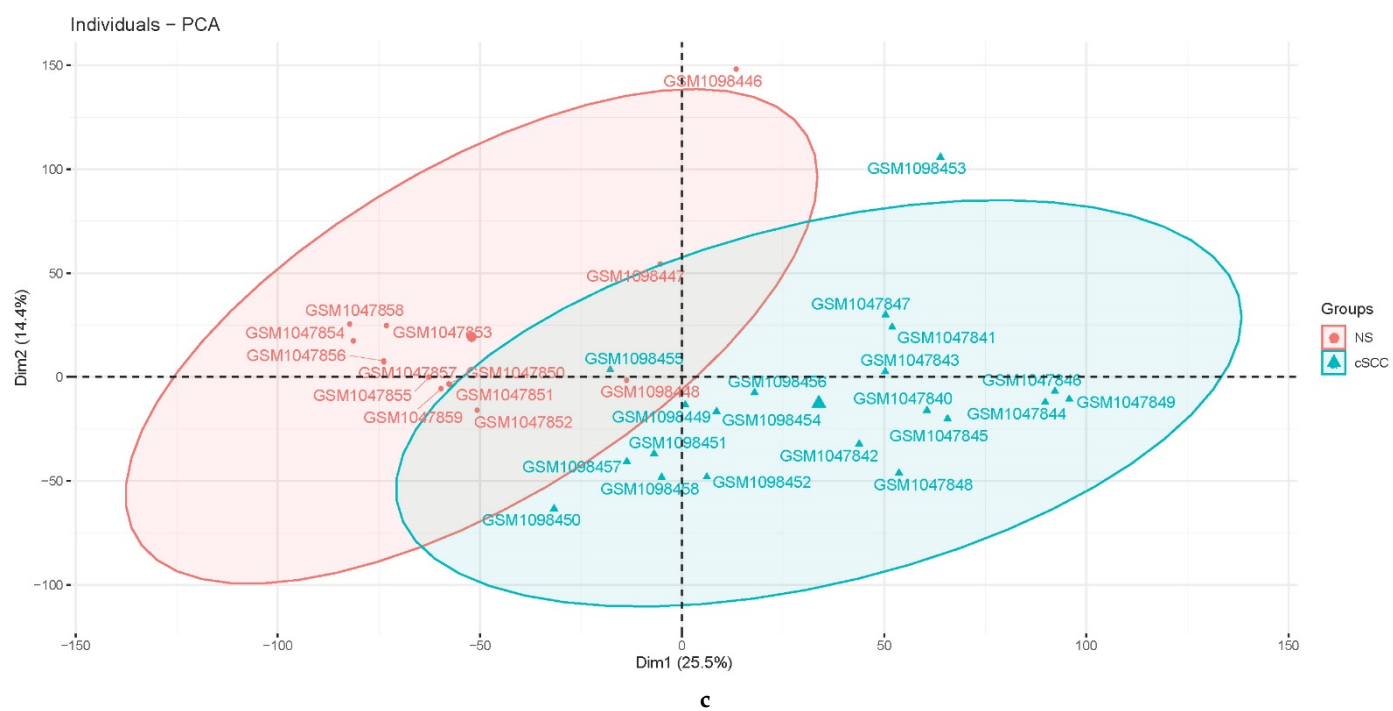

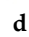

**Figure S1.** Data preprocessing. **(a)** Boxplot for combined datasets of GSE42677 and GSE45164 after quantile normalization without removing batch-effect; **(b)** Boxplot for combined datasets of GSE42677 and GSE45164 after quantile normalization with removing batch-effect; **(c)** The principal component analysis (PCA) of 20 cSCC and 13 NS tissues. **(d)** The cluster heat map of DEGs between 20 cSCC and 13 NS tissues.
