# Supplementary material for: Identifying an lncRNA-Related ceRNA Network to Reveal Novel Targets for a Cutaneous Squamous Cell Carcinoma
Source: Biology (Basel). 2021 May 13;10(5):432. doi: 10.3390/biology10050432 (PMC8152267; doi:10.3390/biology10050432)
Supplement: Supplementary file 1 [file biology-10-00432-s001.zip]

Archive with 10 entries (10 files):
- Figure S1.pdf
- Table S1. The lncRNA-mRNA pairs with significant correlations.xlsx
- Table S2. DElncRNAs-miRNAs pairs of ceRNA network.xlsx
- Table S3. DEmRNAs-miRNAs pairs of ceRNA network.xlsx
- Table S4. Over-expressed and down-expresed lncRNAs of ceRNA network.xlsx
- Table S5. Over-expressed and down-expresed mRNAs of ceRNA network.xlsx
- Table S6. GO enrichment terms of DEmRNAs in ceRNA network.xlsx
- Table S7. KEGG pathway enrichment of DEmRNAs in ceRNA network.xlsx
- Table S8. Details of DElncRNAs-miRNAs pairs of core ceRNA network.xlsx
- Table S9. DEmRNAs-miRNAs pairs of core ceRNA network.xlsx
