# Supplementary material for: Identifying an lncRNA-Related ceRNA Network to Reveal Novel Targets for a Cutaneous Squamous Cell Carcinoma
Source: Biology (Basel). 2021 May 13;10(5):432. doi: 10.3390/biology10050432 (PMC8152267; doi:10.3390/biology10050432)
Supplement: Supplementary file 1 [file biology-10-00432-s001.zip › Table S1. The lncRNA-mRNA pairs with significant correlations.xlsx]

## Sheet: 文中表格结果
TABLE S1. The lncRNA-mRNA pairs with significant correlations.
lncRNA	mRNA	r*	p-value
SNX29P2	SMAD5	0.933432	1.92e-14
HCG18	RBM12B	0.933207	2.02e-14
SNX29P2	S1PR1	0.932111	2.54e-14
SNX29P2	MBTD1	0.930782	3.33e-14
DKFZP434A062	INO80D	0.921277	2.02e-13
DKFZP434A062	STK11	0.918412	3.33e-13
SNX29P2	YTHDC1	0.914522	6.38e-13
HCG18	MBTD1	0.914347	6.57e-13
SNX29P2	RNF2	0.911311	1.07e-12
DKFZP434A062	E2F1	0.910662	1.18e-12
POLR2J4	RBM12B	0.909587	1.39e-12
HCG18	SMAD5	0.908537	1.64e-12
KLF3-AS1	KLHL20	0.908081	1.75e-12
KLF3-AS1	MBTD1	0.906281	2.3e-12
KLF3-AS1	SMAD5	0.90612	2.35e-12
DKFZP434A062	CNNM2	0.90555	2.56e-12
DKFZP434A062	ARID3B	0.904563	2.95e-12
SNX29P2	NF1	0.903795	3.3e-12
KLF3-AS1	S1PR1	0.899608	5.96e-12
SNX29P2	RBM12B	0.895695	1.01e-11
KLF3-AS1	YTHDC1	0.895589	1.02e-11
ANKRD10-IT1	E2F1	0.895145	1.09e-11
SNX29P2	ZBTB18	0.89276	1.48e-11
KLF3-AS1	RBM12B	0.886955	3.06e-11
SNX29P2	CHD9	0.886692	3.16e-11
HYMAI	ZBTB18	0.884015	4.36e-11
HCG18	YTHDC1	0.883537	4.61e-11
KLF3-AS1	PRR14L	0.880926	6.25e-11
POLR2J4	KLHL20	0.879855	7.06e-11
HCG18	KLHL20	0.879571	7.3e-11
SNX29P2	KLHL20	0.879442	7.41e-11
DKFZP434A062	ETS1	0.877654	9.06e-11
SNX29P2	VPS13C	0.875946	1.1e-10
SNX29P2	LIFR	0.873599	1.41e-10
KLF3-AS1	CHD9	0.872289	1.63e-10
DKFZP434A062	IKZF4	0.872258	1.63e-10
KLF3-AS1	RNF2	0.868725	2.37e-10
RFPL3S	RNF2	0.868328	2.47e-10
SNX29P2	SNRK	0.86776	2.62e-10
POLR2J4	YTHDC1	0.867665	2.64e-10
SNX29P2	BRWD1	0.86628	3.05e-10
ADD3-AS1	PPARG	0.862738	4.35e-10
KLF3-AS1	VPS13C	0.861975	4.69e-10
HYMAI	YTHDC1	0.861537	4.89e-10
HYMAI	LONRF1	0.861399	4.96e-10
KLF3-AS1	PPARG	0.860979	5.17e-10
LINC00342	POGZ	0.860443	5.44e-10
DKFZP434A062	ESRRA	0.86029	5.52e-10
HYMAI	RNF2	0.860264	5.54e-10
HCG18	POGZ	0.86023	5.56e-10
HCG18	CHD9	0.860029	5.67e-10
KLF3-AS1	SNRK	0.859113	6.19e-10
POLR2J4	MBTD1	0.858861	6.34e-10
HCG9	ETS1	0.85812	6.81e-10
AC074212	STK11	0.857545	7.19e-10
HYMAI	MBTD1	0.85743	7.27e-10
HYMAI	CHD9	0.857267	7.38e-10
SNX29P2	PPARG	0.855586	8.65e-10
DTX2P1-UPK3BP1-PMS2P11	E2F1	0.855055	9.09e-10
RPARP-AS1	MBTD1	0.853436	1.06e-09
HCG18	PRR14L	0.853388	1.06e-09
HCG18	RBL1	0.853087	1.09e-09
HYMAI	RBM12B	0.852807	1.12e-09
HYMAI	VPS13C	0.852753	1.12e-09
HCG18	RBL2	0.852542	1.15e-09
RFPL3S	S1PR1	0.852231	1.18e-09
HCG9	STK11	0.851462	1.27e-09
HYMAI	FOXJ2	0.851391	1.27e-09
HCG18	SNRK	0.851121	1.31e-09
POLR2J4	SMAD5	0.851079	1.31e-09
HYMAI	S1PR1	0.849991	1.45e-09
RFPL3S	PPARG	0.849664	1.49e-09
DTX2P1-UPK3BP1-PMS2P11	STK11	0.849214	1.55e-09
LINC00342	MBTD1	0.84892	1.59e-09
HYMAI	SMAD5	0.848852	1.6e-09
CTC-338M12	RBL1	0.847286	1.84e-09
DTX2P1-UPK3BP1-PMS2P11	ESRRA	0.846237	2.02e-09
SNX29P2	MED13	0.845636	2.13e-09
HCG18	S1PR1	0.844895	2.27e-09
THAP9-AS1	PRKAA1	0.844321	2.38e-09
POLR2J4	CHD9	0.844098	2.43e-09
LINC00342	GOLGA8A	0.843827	2.49e-09
RFPL3S	EZH1	0.842832	2.71e-09
DKFZP434A062	LFNG	0.842539	2.78e-09
HLA-F-AS1	ANKH	0.84243	2.8e-09
ADD3-AS1	ANKH	0.842345	2.82e-09
HCG18	MED13	0.842279	2.84e-09
KLF3-AS1	MED13	0.841955	2.92e-09
AC074212	LFNG	0.841641	3e-09
RPARP-AS1	SMAD5	0.841634	3e-09
ADD3-AS1	NR3C2	0.84105	3.15e-09
RPARP-AS1	AFF1	0.839767	3.51e-09
THAP9-AS1	HNRNPDL	0.839207	3.68e-09
ADD3-AS1	S1PR1	0.838683	3.84e-09
HYMAI	NPAT	0.837909	4.09e-09
SNX29P2	LONRF1	0.837883	4.1e-09
RFPL3S	NF1	0.837504	4.23e-09
HYMAI	BRWD1	0.836323	4.67e-09
SNX29P2	EZH1	0.836049	4.77e-09
KLF3-AS1	GOLGA8A	0.835686	4.91e-09
SNX29P2	CENPQ	0.83513	5.14e-09
POLR2J4	POGZ	0.834671	5.34e-09
HYMAI	SESN1	0.834561	5.38e-09
KLF3-AS1	ZBTB18	0.834454	5.43e-09
HCG18	ZBTB18	0.833367	5.93e-09
RFPL3S	MBTD1	0.83314	6.04e-09
SNX29P2	ACSL4	0.832057	6.58e-09
KLF3-AS1	EZH1	0.830964	7.18e-09
THAP9-AS1	CEP57	0.830646	7.36e-09
POLR2J4	SNRK	0.830374	7.52e-09
KLF3-AS1	LIFR	0.830363	7.52e-09
SNX29P2	INPP5A	0.829046	8.34e-09
SNX29P2	GOLGA8A	0.828549	8.67e-09
POLR2J4	RBL2	0.828519	8.69e-09
HCG18	GOLGA8A	0.827763	9.22e-09
AC074212	ETS1	0.827493	9.41e-09
RFPL3S	CHD9	0.826269	1.03e-08
RPARP-AS1	S1PR1	0.826101	1.05e-08
HCG18	RNF2	0.825466	1.1e-08
HYMAI	KLHL20	0.825051	1.13e-08
KLF3-AS1	ACSL4	0.824846	1.15e-08
HCG18	VPS13C	0.824701	1.17e-08
HYMAI	CCNT2	0.824195	1.21e-08
HYMAI	PPARG	0.823912	1.24e-08
RPARP-AS1	KLHL20	0.822688	1.36e-08
HYMAI	EZH1	0.822251	1.4e-08
LINC00342	KLHL20	0.82213	1.41e-08
KLF3-AS1	NF1	0.820999	1.54e-08
HCG18	WNK1	0.820863	1.55e-08
ZNF213-AS1	CRY2	0.818737	1.82e-08
HCG18	NF1	0.818173	1.89e-08
KLF3-AS1	ANKH	0.817862	1.94e-08
HCG9	LFNG	0.817701	1.96e-08
THAP9-AS1	HNRNPD	0.817638	1.97e-08
RPARP-AS1	LONRF1	0.816901	2.08e-08
SNX29P2	EXPH5	0.816647	2.12e-08
ANKRD10-IT1	C11orf24	0.81574	2.26e-08
RPARP-AS1	GOLGA8A	0.815736	2.26e-08
RFPL3S	ZBTB18	0.815637	2.27e-08
ADD3-AS1	SEMA6D	0.815541	2.29e-08
HCG18	PPARG	0.81554	2.29e-08
SNX29P2	HIVEP1	0.815481	2.3e-08
KLF3-AS1	POGZ	0.815097	2.36e-08
RPARP-AS1	PPARG	0.814545	2.46e-08
KLF3-AS1	LONRF1	0.814391	2.49e-08
RFPL3S	PRR14L	0.81409	2.54e-08
POLR2J4	VPS13C	0.812535	2.84e-08
HCG18	LONRF1	0.812442	2.85e-08
SNX29P2	SFPQ	0.812015	2.94e-08
SND1-IT1	PPARG	0.811979	2.95e-08
THAP9-AS1	SFPQ	0.811874	2.97e-08
DKFZP434A062	PIM2	0.811767	2.99e-08
KLF3-AS1	RBL1	0.811652	3.02e-08
RPARP-AS1	YTHDC1	0.811617	3.02e-08
THAP9-AS1	CCNT2	0.81161	3.03e-08
CTC-338M12	SMAD5	0.811601	3.03e-08
SND1-IT1	EZH1	0.811078	3.14e-08
POLR2J4	PRR14L	0.810339	3.31e-08
ADD3-AS1	CRY2	0.809812	3.43e-08
SNX29P2	CDC42SE1	0.809614	3.48e-08
HCG18	HOXC6	0.80945	3.52e-08
DLEU2	SFPQ	0.809347	3.54e-08
HYMAI	SNRK	0.809134	3.6e-08
HCG18	EZH1	0.808949	3.64e-08
SNX29P2	RBL2	0.808573	3.74e-08
LINC00342	YTHDC1	0.808398	3.78e-08
SNX29P2	ARNTL	0.808213	3.83e-08
SNX29P2	ADD3	0.8082	3.83e-08
POLR2J4	ETV6	0.808104	3.86e-08
LINC00894	EZH1	0.80688	4.2e-08
FAM215A	STK11	0.806812	4.22e-08
CTC-338M12	RNF2	0.806571	4.29e-08
RFPL3S	KLHL20	0.806273	4.37e-08
HYMAI	ARID4B	0.806206	4.39e-08
POLR2J4	ARNTL	0.806145	4.41e-08
RFPL3S	ANKH	0.805931	4.48e-08
HCG18	PNISR	0.80583	4.51e-08
ZNF213-AS1	ANKH	0.805028	4.76e-08
CTC-338M12	NPAT	0.804972	4.78e-08
LINC00342	SMAD5	0.804719	4.86e-08
HYMAI	SIRT1	0.804421	4.96e-08
HCG18	ANKRD12	0.804277	5.01e-08
HCG18	SFPQ	0.803691	5.21e-08
HCG18	NPAT	0.803475	5.28e-08
HYMAI	SECISBP2L	0.803307	5.34e-08
FAM215A	ETS1	0.803306	5.34e-08
SNX29P2	MED1	0.803156	5.4e-08
ADD3-AS1	EZH1	0.8029	5.49e-08
RPARP-AS1	RBM12B	0.80165	5.96e-08
HYMAI	TULP4	0.801325	6.09e-08
HYMAI	MED13	0.80127	6.12e-08
POLR2J4	TOPORS	0.801236	6.13e-08
POLR2J4	EZH1	0.801146	6.17e-08
POLR2J4	ZBTB18	0.800921	6.26e-08
RFPL3S	NR3C2	0.800263	6.53e-08
SNX29P2	SIRT1	0.799265	6.98e-08
KLF3-AS1	HOXC6	0.799166	7.02e-08
RFPL3S	SEMA6D	0.798624	7.27e-08
SNX29P2	ANKRD12	0.798443	7.36e-08
HCG18	LIFR	0.798393	7.38e-08
KLF3-AS1	ETV6	0.798037	7.56e-08
CTC-338M12	HIVEP1	0.797896	7.63e-08
KLF3-AS1	TRIM36	0.797108	8.02e-08
CTC-338M12	MED13	0.796904	8.13e-08
FAM215A	LFNG	0.79653	8.33e-08
LINC00342	S1PR1	0.795664	8.81e-08
SNX29P2	ANKH	0.795543	8.87e-08
KLF3-AS1	NR3C2	0.795367	8.97e-08
SNX29P2	SECISBP2L	0.795339	8.99e-08
FAM215A	PIM2	0.795161	9.09e-08
LINC00342	SNRK	0.795102	9.13e-08
HCG18	BRWD1	0.795067	9.15e-08
SNX29P2	FOXJ2	0.795059	9.15e-08
CTC-338M12	OXR1	0.794836	9.28e-08
THAP9-AS1	BAZ2B	0.794681	9.38e-08
SNX29P2	TNKS2	0.794616	9.41e-08
HYMAI	GOLGA8A	0.794245	9.64e-08
POLR2J4	LONRF1	0.794079	9.74e-08
DTX2P1-UPK3BP1-PMS2P11	ETS1	0.79352	1.01e-07
LINC00342	HOXC6	0.793489	1.01e-07
THAP9-AS1	ZNF107	0.793453	1.01e-07
LINC00342	PPARG	0.793303	1.02e-07
HCG18	MSANTD2	0.793192	1.03e-07
LINC00342	VPS13C	0.792901	1.05e-07
KLF3-AS1	CENPQ	0.792447	1.08e-07
POLR2J4	RNF2	0.792352	1.09e-07
SND1-IT1	S1PR1	0.792216	1.1e-07
SNX29P2	ARID4B	0.791414	1.15e-07
LINC00342	LIFR	0.791188	1.17e-07
DTX2P1-UPK3BP1-PMS2P11	PHKA1	0.790954	1.19e-07
HYMAI	ZMYM2	0.790811	1.2e-07
THAP9-AS1	HMGB2	0.790741	1.2e-07
HCG18	HNRNPA3	0.790689	1.21e-07
HCG18	MED1	0.790647	1.21e-07
LINC00342	PRR14L	0.790415	1.23e-07
HCG18	PDS5B	0.790235	1.24e-07
POLR2J4	SIKE1	0.790012	1.26e-07
SND1-IT1	PRR14L	0.789676	1.28e-07
RFPL3S	NUP43	0.789645	1.29e-07
THAP9-AS1	ZBTB18	0.789443	1.3e-07
KLF3-AS1	SFPQ	0.789408	1.31e-07
HYMAI	NUP43	0.789024	1.34e-07
HYMAI	LIFR	0.788717	1.36e-07
HCG9	INO80D	0.788595	1.37e-07
SNX29P2	TULP4	0.788262	1.4e-07
THAP9-AS1	RBL1	0.787691	1.45e-07
CTC-338M12	NCOA2	0.787606	1.46e-07
THAP9-AS1	HNRNPA3	0.787197	1.5e-07
DTX2P1-UPK3BP1-PMS2P11	CNN2	0.787129	1.5e-07
KLF3-AS1	BCOR	0.786951	1.52e-07
ANKRD10-IT1	ETS1	0.78673	1.54e-07
HCG18	CENPQ	0.786479	1.56e-07
POLR2J4	AFF1	0.786319	1.58e-07
DTX2P1-UPK3BP1-PMS2P11	CNNM2	0.786278	1.58e-07
HYMAI	POGZ	0.786069	1.6e-07
RPARP-AS1	RBL2	0.785899	1.62e-07
POLR2J4	S1PR1	0.785667	1.64e-07
SNX29P2	TNRC6B	0.785499	1.66e-07
HYMAI	NR3C2	0.785496	1.66e-07
DTX2P1-UPK3BP1-PMS2P11	ARID3B	0.785071	1.7e-07
HYMAI	ANKRD12	0.784891	1.72e-07
DKFZP434A062	CHAC1	0.784794	1.73e-07
LINC00342	CHD9	0.784524	1.76e-07
RFPL3S	RBM12B	0.784517	1.76e-07
LINC00342	SFPQ	0.784496	1.76e-07
THAP9-AS1	PDS5B	0.784463	1.77e-07
THAP9-AS1	MSANTD2	0.784428	1.77e-07
POLR2J4	ANKRD12	0.784012	1.81e-07
HYMAI	NF1	0.783975	1.82e-07
POLR2J4	ZNF107	0.782831	1.95e-07
DKFZP434A062	PLEKHO2	0.78278	1.95e-07
RFPL3S	YTHDC1	0.782316	2.01e-07
SNX29P2	PRR14L	0.782219	2.02e-07
POLR2J4	GOLGA8A	0.782155	2.03e-07
RFPL3S	ARID4B	0.782121	2.03e-07
POLR2J4	RBL1	0.781925	2.06e-07
KLF3-AS1	ARID4B	0.781716	2.08e-07
SNX29P2	MAP3K8	0.781595	2.1e-07
AC074212	INO80D	0.781319	2.13e-07
HLA-F-AS1	S1PR1	0.781199	2.15e-07
SNX29P2	EPM2AIP1	0.780822	2.19e-07
POLR2J4	SFPQ	0.780741	2.21e-07
KLF3-AS1	ANKRD12	0.780615	2.22e-07
SNX29P2	RBL1	0.780496	2.24e-07
CTC-338M12	MSANTD2	0.780429	2.25e-07
ANKRD10-IT1	STK11	0.78027	2.27e-07
HYMAI	EPM2AIP1	0.78006	2.3e-07
CTC-338M12	ANKRD12	0.77946	2.38e-07
SNX29P2	GEMIN2	0.779063	2.43e-07
SNX29P2	PDS5B	0.778888	2.46e-07
HCG18	ERAP1	0.778558	2.51e-07
ANKRD10-IT1	CNNM2	0.778332	2.54e-07
HCG18	FOXJ2	0.778313	2.54e-07
POLR2J4	MBNL3	0.778289	2.55e-07
HYMAI	AGO4	0.778066	2.58e-07
HCG9	PIM2	0.778044	2.58e-07
RFPL3S	ERAP1	0.775939	2.92e-07
CTC-338M12	SESN1	0.775853	2.93e-07
THAP9-AS1	CHD9	0.775515	2.99e-07
SND1-IT1	NUP43	0.775476	3e-07
SNX29P2	SIKE1	0.77546	3e-07
RFPL3S	LONRF1	0.775255	3.04e-07
CTC-338M12	GEMIN2	0.775156	3.05e-07
HLA-F-AS1	SESN1	0.774035	3.26e-07
HYMAI	ADD3	0.773799	3.3e-07
HCG18	MBNL3	0.773714	3.32e-07
RFPL3S	NPAT	0.773576	3.34e-07
ZNF213-AS1	BCL7A	0.772882	3.48e-07
RFPL3S	VPS13C	0.772784	3.5e-07
HCG18	ACSL4	0.772754	3.5e-07
HYMAI	SFPQ	0.772731	3.51e-07
ZNF213-AS1	AGO4	0.772731	3.51e-07
HCG18	ARNTL	0.772676	3.52e-07
KLF3-AS1	RBL2	0.772628	3.53e-07
ANKRD10-IT1	ESRRA	0.772462	3.56e-07
SNX29P2	RAB14	0.772455	3.56e-07
HCG18	EPM2AIP1	0.77231	3.59e-07
HCG18	TOPORS	0.772041	3.65e-07
SNX29P2	AMOTL2	0.77204	3.65e-07
HCG18	ANKH	0.772023	3.65e-07
SND1-IT1	RNF2	0.771665	3.73e-07
POLR2J4	HOXC6	0.771569	3.75e-07
ZNF213-AS1	EZH1	0.771379	3.79e-07
HLA-F-AS1	NR3C2	0.770995	3.87e-07
THAP9-AS1	BTBD3	0.770637	3.95e-07
SNX29P2	ETV6	0.770491	3.98e-07
SND1-IT1	MBTD1	0.770429	4e-07
CTC-338M12	SIRT1	0.770358	4.01e-07
HYMAI	EXPH5	0.770253	4.04e-07
CTC-338M12	HNRNPA3	0.769996	4.09e-07
HLA-F-AS1	EZH1	0.769992	4.09e-07
DTX2P1-UPK3BP1-PMS2P11	INO80D	0.769813	4.14e-07
AC074212	IKZF4	0.769674	4.17e-07
CTC-338M12	CCNT2	0.76965	4.17e-07
POLR2J4	WNK1	0.769541	4.2e-07
KLF3-AS1	AFF1	0.769513	4.21e-07
POLR2J4	NFAT5	0.769455	4.22e-07
THAP9-AS1	TOPORS	0.769425	4.23e-07
CTC-338M12	YTHDC1	0.769364	4.24e-07
KLF3-AS1	ADD3	0.769181	4.28e-07
DLEU2	PNISR	0.76902	4.32e-07
HYMAI	CDC42SE1	0.768736	4.39e-07
FAM215A	INO80D	0.768708	4.4e-07
LINC00342	BRWD1	0.768363	4.48e-07
HCG18	NUP43	0.767841	4.62e-07
POLR2J4	TNKS2	0.767766	4.64e-07
HCG18	AFF1	0.767548	4.69e-07
RPARP-AS1	SNRK	0.767495	4.71e-07
HCG18	HNRNPDL	0.767469	4.71e-07
KLF3-AS1	EPM2AIP1	0.767287	4.76e-07
KLF3-AS1	CCNT2	0.766974	4.84e-07
HYMAI	ACSL4	0.766513	4.97e-07
HYMAI	ANKH	0.766438	4.99e-07
POLR2J4	MED13	0.766219	5.05e-07
RFPL3S	SMAD5	0.766183	5.06e-07
ADD3-AS1	MBTD1	0.766169	5.06e-07
THAP9-AS1	U2SURP	0.765914	5.13e-07
SND1-IT1	AGO4	0.765815	5.16e-07
ANKRD10-IT1	ARID3B	0.765793	5.17e-07
HCG18	PPAT	0.765547	5.24e-07
HCG18	NFAT5	0.765289	5.31e-07
HCG18	ETV6	0.765	5.4e-07
LINC00342	LONRF1	0.764987	5.4e-07
THAP9-AS1	ZMYM2	0.764757	5.47e-07
KLF3-AS1	MED1	0.764674	5.49e-07
RFPL3S	SNRK	0.764298	5.61e-07
POLR2J4	COX20	0.763833	5.75e-07
CTC-338M12	RBM12B	0.763823	5.75e-07
KLF3-AS1	FOXJ2	0.763744	5.78e-07
KLF3-AS1	SECISBP2L	0.763707	5.79e-07
ADD3-AS1	PRR14L	0.763375	5.9e-07
SNX29P2	NR3C2	0.763362	5.9e-07
KLF3-AS1	HIVEP1	0.76331	5.92e-07
LINC00342	RBL1	0.763147	5.97e-07
POLR2J4	NF1	0.76296	6.03e-07
DLEU2	HNRNPA3	0.762898	6.05e-07
ANKRD10-IT1	PLEKHO2	0.762808	6.08e-07
LINC00342	EZH1	0.762685	6.12e-07
AC074212	E2F1	0.762556	6.16e-07
CTC-338M12	PNISR	0.76231	6.25e-07
SNX29P2	ATG16L1	0.762204	6.28e-07
DTX2P1-UPK3BP1-PMS2P11	IKZF4	0.762156	6.3e-07
HCG18	CCNT2	0.761987	6.36e-07
SND1-IT1	CHD9	0.76197	6.36e-07
KLF3-AS1	WNK1	0.76155	6.51e-07
HYMAI	TAOK1	0.761351	6.58e-07
POLR2J4	HNRNPA3	0.760983	6.71e-07
SND1-IT1	ANKH	0.760905	6.74e-07
SNX29P2	MYLIP	0.760678	6.82e-07
HYMAI	MAP3K8	0.760553	6.86e-07
LINC00342	ZBTB18	0.760522	6.88e-07
HYMAI	INPP5A	0.760228	6.98e-07
HCG18	NCOA2	0.759884	7.11e-07
THAP9-AS1	ZNF217	0.759775	7.16e-07
POLR2J4	TRIM36	0.759388	7.3e-07
CTC-338M12	FOXJ2	0.758429	7.69e-07
LINC00342	PNISR	0.7584	7.7e-07
HYMAI	HNRNPA3	0.758247	7.76e-07
AC074212	PIM2	0.758136	7.81e-07
ANKRD10-IT1	CNN2	0.758105	7.82e-07
THAP9-AS1	PKD2	0.757935	7.89e-07
CTC-338M12	SPRY2	0.757919	7.9e-07
HYMAI	AMOTL2	0.757774	7.96e-07
HYMAI	PNISR	0.757195	8.2e-07
SNX29P2	BTBD3	0.757175	8.21e-07
HCG18	HIVEP1	0.757146	8.22e-07
POLR2J4	PPARG	0.757064	8.26e-07
HCG18	BCOR	0.756976	8.3e-07
SNX29P2	REV3L	0.756848	8.36e-07
HCG18	NR3C2	0.756844	8.36e-07
LINC00342	NF1	0.756588	8.47e-07
HCG9	IKZF4	0.756518	8.5e-07
SNX29P2	CCNT2	0.75651	8.5e-07
ANKRD10-IT1	TRAF6	0.756477	8.52e-07
CTC-338M12	PDS5B	0.756462	8.53e-07
KLF3-AS1	PDS5B	0.756297	8.6e-07
POLR2J4	BRWD1	0.756148	8.67e-07
SNX29P2	PIGA	0.756079	8.7e-07
KLF3-AS1	ERAP1	0.755808	8.82e-07
SNX29P2	POGZ	0.755327	9.05e-07
CTC-338M12	WNK1	0.755279	9.07e-07
HCG18	ZNF107	0.755098	9.16e-07
RFPL3S	TAOK1	0.755035	9.19e-07
HYMAI	SCML1	0.754832	9.28e-07
SNX29P2	NFAT5	0.754794	9.3e-07
RFPL3S	LIFR	0.754572	9.41e-07
POLR2J4	BCL7A	0.754177	9.61e-07
SND1-IT1	KLHL20	0.754103	9.64e-07
LINC00115	SIRT1	0.754082	9.65e-07
POLR2J4	MED1	0.753501	9.95e-07
LINC00342	RBM12B	0.753469	9.97e-07
HCG18	TNRC6B	0.753439	9.98e-07
HYMAI	ZNF107	0.75318	1.01e-06
LINC00115	RNF2	0.753092	1.02e-06
ZNF213-AS1	TGFBR3	0.753044	1.02e-06
ADD3-AS1	RNF2	0.752564	1.04e-06
SNX29P2	TOPORS	0.752242	1.06e-06
THAP9-AS1	YTHDC1	0.752178	1.07e-06
SND1-IT1	RBM12B	0.752095	1.07e-06
HCG18	TRIM36	0.752051	1.07e-06
SNX29P2	SESN1	0.752045	1.07e-06
HCG18	ATG16L1	0.751922	1.08e-06
CTC-338M12	ZMYM2	0.751804	1.09e-06
CTC-338M12	PPAT	0.751762	1.09e-06
HYMAI	HOXC6	0.751593	1.1e-06
THAP9-AS1	RBM12B	0.751409	1.11e-06
KLF3-AS1	BRWD1	0.751319	1.11e-06
HYMAI	PIGA	0.751216	1.12e-06
LINC00342	PRKAA1	0.751193	1.12e-06
LINC00342	MED13	0.751082	1.13e-06
HYMAI	RBL1	0.750979	1.13e-06
SNX29P2	WNK1	0.750823	1.14e-06
SNX29P2	HNRNPA3	0.750741	1.15e-06
POLR2J4	NCOA2	0.750678	1.15e-06
HYMAI	PDS5B	0.750585	1.16e-06
KLF3-AS1	TNRC6B	0.750457	1.16e-06
HYMAI	REV3L	0.750445	1.16e-06
HLA-F-AS1	FRAT2	0.750229	1.18e-06
THAP9-AS1	FMR1	0.750202	1.18e-06
AC074212	SZRD1	0.749864	1.2e-06
ANKRD10-IT1	INO80D	0.749855	1.2e-06
SNX29P2	ZMYM2	0.749665	1.21e-06
CTC-338M12	EPM2AIP1	0.749119	1.25e-06
RPARP-AS1	VPS13C	0.748969	1.25e-06
LINC00342	HNRNPDL	0.748889	1.26e-06
CTC-338M12	MBTD1	0.748739	1.27e-06
ANKRD10-IT1	TARBP2	0.74851	1.28e-06
THAP9-AS1	HOXC6	0.748374	1.29e-06
CTC-338M12	CLCC1	0.748242	1.3e-06
ZNF213-AS1	LONRF1	0.747923	1.32e-06
RPARP-AS1	EZH1	0.747899	1.32e-06
ANKRD10-IT1	IKZF4	0.747778	1.33e-06
RPARP-AS1	MED1	0.747356	1.36e-06
KLF3-AS1	NFAT5	0.747314	1.36e-06
HYMAI	CCNJ	0.747162	1.37e-06
THAP9-AS1	KLHL20	0.746803	1.4e-06
HCG18	BHLHB9	0.746777	1.4e-06
POLR2J4	CCNT2	0.746594	1.41e-06
LINC00342	CEP192	0.746444	1.42e-06
SNX29P2	NPAT	0.746418	1.43e-06
SNX29P2	HOXC6	0.746242	1.44e-06
SNX29P2	GSE1	0.745994	1.46e-06
KLF3-AS1	CDC42SE1	0.745902	1.46e-06
HCG18	ZMYM2	0.745708	1.48e-06
KLF3-AS1	TOPORS	0.74563	1.48e-06
RFPL3S	SECISBP2L	0.745381	1.5e-06
POLR2J4	CENPQ	0.745051	1.53e-06
KLF3-AS1	PRKAA1	0.745036	1.53e-06
CTC-338M12	LONRF1	0.745026	1.53e-06
KLF3-AS1	NPAT	0.744866	1.54e-06
CTC-338M12	ERAP1	0.744476	1.57e-06
HLA-F-AS1	CRY2	0.744161	1.6e-06
KLF3-AS1	HNRNPDL	0.743919	1.62e-06
HCG18	SIKE1	0.743855	1.62e-06
POLR2J4	TNRC6B	0.743844	1.62e-06
THAP9-AS1	YTHDF3	0.743594	1.64e-06
THAP9-AS1	ANKRD12	0.743582	1.64e-06
THAP9-AS1	RBL2	0.743266	1.67e-06
HYMAI	PRR14L	0.743236	1.67e-06
CTC-338M12	RBL2	0.743172	1.68e-06
LINC00342	RBL2	0.74309	1.68e-06
CTC-338M12	VPS13C	0.742974	1.69e-06
THAP9-AS1	TBC1D8	0.742931	1.7e-06
LINC00342	BCOR	0.742833	1.7e-06
HLA-F-AS1	SIRT1	0.742803	1.71e-06
SNX29P2	SCML1	0.742523	1.73e-06
KLF3-AS1	MSANTD2	0.742065	1.77e-06
HCG18	EXPH5	0.741566	1.81e-06
ADD3-AS1	ERAP1	0.741517	1.82e-06
HYMAI	TBC1D8	0.741045	1.86e-06
SND1-IT1	SEMA6D	0.74098	1.87e-06
CTC-338M12	HNRNPDL	0.740938	1.87e-06
POLR2J4	CCNJ	0.740841	1.88e-06
ANKRD10-IT1	PHKA1	0.740815	1.88e-06
ANKRD10-IT1	NRIP3	0.740591	1.9e-06
LINC00342	PKD2	0.740453	1.92e-06
RPARP-AS1	PRR14L	0.740424	1.92e-06
RFPL3S	AGO4	0.740393	1.92e-06
HCG18	TNKS2	0.740277	1.93e-06
SNX29P2	OXR1	0.74008	1.95e-06
CTC-338M12	GOLGA8A	0.739899	1.97e-06
SNX29P2	RFX7	0.739835	1.97e-06
POLR2J4	FOXJ2	0.739834	1.97e-06
KLF3-AS1	EXPH5	0.739714	1.99e-06
CTC-338M12	SFPQ	0.739444	2.01e-06
KLF3-AS1	PNISR	0.739249	2.03e-06
HYMAI	TRIM36	0.739073	2.05e-06
LINC00894	BCL7A	0.738878	2.07e-06
ANKRD10-IT1	PLXND1	0.738822	2.07e-06
HCG18	PRKAA1	0.738783	2.08e-06
HCG18	CEP57	0.738502	2.11e-06
CTC-338M12	ACSL4	0.738244	2.13e-06
HLA-F-AS1	LONRF1	0.738164	2.14e-06
LINC00115	YTHDC1	0.737951	2.16e-06
KLF3-AS1	SIRT1	0.737841	2.17e-06
HYMAI	PER2	0.73768	2.19e-06
RPARP-AS1	POGZ	0.737252	2.24e-06
HYMAI	NCOA2	0.737207	2.24e-06
KLF3-AS1	HNRNPA3	0.737194	2.24e-06
SNX29P2	TRIM36	0.737133	2.25e-06
POLR2J4	PNISR	0.736695	2.3e-06
HYMAI	YTHDF3	0.73667	2.3e-06
KLF3-AS1	ZNF107	0.736429	2.33e-06
THAP9-AS1	ARID4B	0.736425	2.33e-06
ANKRD10-IT1	SZRD1	0.736256	2.35e-06
RFPL3S	LRRC2	0.736141	2.36e-06
KLF3-AS1	TNKS2	0.736125	2.36e-06
HCG9	CNNM2	0.735974	2.38e-06
KLF3-AS1	CCND1	0.735953	2.38e-06
RPARP-AS1	RNF2	0.735871	2.39e-06
DLEU2	VPS13C	0.735495	2.43e-06
HYMAI	MED1	0.7353	2.46e-06
THAP9-AS1	BCOR	0.735203	2.47e-06
THAP9-AS1	HBS1L	0.734728	2.52e-06
SNX29P2	RAPGEF4	0.734613	2.54e-06
SNX29P2	EEA1	0.734207	2.59e-06
RFPL3S	PER2	0.733885	2.63e-06
SNX29P2	CEP57	0.733661	2.65e-06
THAP9-AS1	OXR1	0.733519	2.67e-06
LINC00115	DCK	0.733381	2.69e-06
SNX29P2	TBC1D8	0.733185	2.71e-06
SND1-IT1	VPS13C	0.733178	2.72e-06
CTC-338M12	DCK	0.733169	2.72e-06
THAP9-AS1	EPM2AIP1	0.733039	2.73e-06
LINC00342	ANKH	0.732868	2.76e-06
RPARP-AS1	EXPH5	0.73269	2.78e-06
THAP9-AS1	ATG14	0.732439	2.81e-06
RFPL3S	KLF10	0.73236	2.82e-06
KLF3-AS1	BHLHB9	0.732098	2.86e-06
RFPL3S	MAP3K8	0.732097	2.86e-06
LINC00342	RNF2	0.731923	2.88e-06
DLEU2	PDS5B	0.731844	2.89e-06
KLF3-AS1	MAP3K8	0.731741	2.91e-06
KLF3-AS1	PER2	0.731735	2.91e-06
LINC00894	MBNL3	0.731653	2.92e-06
CTC-338M12	POLD3	0.731505	2.94e-06
KLF3-AS1	RFX7	0.731384	2.95e-06
SNX29P2	BCOR	0.731373	2.96e-06
HYMAI	DLG5	0.731138	2.99e-06
FAM215A	CNNM2	0.73072	3.05e-06
POLR2J4	LIFR	0.730701	3.05e-06
DLEU2	RSBN1	0.730665	3.06e-06
RPARP-AS1	TNRC6B	0.730483	3.08e-06
KLF3-AS1	PKD2	0.730086	3.14e-06
SNX29P2	HNRNPDL	0.729974	3.16e-06
SNX29P2	U2SURP	0.729853	3.17e-06
LINC00342	NUP43	0.729727	3.19e-06
SND1-IT1	GOLGA8A	0.729592	3.21e-06
POLR2J4	ZMYM2	0.729345	3.25e-06
LINC00894	LONRF1	0.729332	3.25e-06
LINC00894	CRY2	0.729082	3.29e-06
HYMAI	PRKAA1	0.729029	3.3e-06
SNX29P2	ERAP1	0.728935	3.31e-06
HYMAI	TNKS2	0.728707	3.35e-06
LINC00894	ANKH	0.7286	3.36e-06
SNX29P2	CCNJ	0.728571	3.37e-06
RPARP-AS1	BRWD1	0.728393	3.4e-06
KLF3-AS1	ZMYM2	0.728344	3.4e-06
LINC00342	HNRNPA3	0.72827	3.42e-06
HYMAI	BHLHB9	0.727822	3.49e-06
HYMAI	KLF10	0.727821	3.49e-06
CTC-338M12	ZBTB18	0.727793	3.49e-06
CTC-338M12	BHLHB9	0.727731	3.5e-06
DKFZP434A062	PHKA1	0.727634	3.52e-06
LINC00342	ADD3	0.727603	3.52e-06
DTX2P1-UPK3BP1-PMS2P11	PIM2	0.72755	3.53e-06
HCG18	ARID4B	0.727497	3.54e-06
RPARP-AS1	LIFR	0.72718	3.59e-06
POLR2J4	PDS5B	0.726948	3.63e-06
SNX29P2	HNRNPD	0.726903	3.64e-06
HCG18	TAOK1	0.726833	3.65e-06
ANKRD10-IT1	PTPN9	0.726556	3.7e-06
THAP9-AS1	NCOA2	0.726464	3.71e-06
THAP9-AS1	SIKE1	0.726408	3.72e-06
LINC00894	KLHL20	0.726236	3.75e-06
POLR2J4	SIRT1	0.72621	3.75e-06
LINC00342	EPM2AIP1	0.726194	3.76e-06
THAP9-AS1	PNISR	0.726179	3.76e-06
LINC00894	PRR14L	0.726064	3.78e-06
SNX29P2	PNISR	0.726063	3.78e-06
RPARP-AS1	ETV6	0.725783	3.83e-06
KLF3-AS1	TULP4	0.725732	3.84e-06
DTX2P1-UPK3BP1-PMS2P11	C11orf24	0.725254	3.92e-06
THAP9-AS1	SMAD5	0.725015	3.97e-06
SNX29P2	FMR1	0.724964	3.97e-06
HLA-F-AS1	MAP3K8	0.724858	3.99e-06
LINC00894	DLG5	0.724457	4.07e-06
CTC-338M12	ARID4B	0.724355	4.09e-06
SNX29P2	RSBN1	0.723589	4.23e-06
LINC00115	CEP57	0.723139	4.32e-06
KLF3-AS1	SIKE1	0.722842	4.38e-06
RFPL3S	INPP5A	0.722827	4.38e-06
SNX29P2	LRRC2	0.722794	4.39e-06
CTC-338M12	PKD2	0.722706	4.4e-06
ADD3-AS1	LIFR	0.722651	4.41e-06
HLA-F-AS1	PPARG	0.722429	4.46e-06
SND1-IT1	SMAD5	0.722287	4.49e-06
DTX2P1-UPK3BP1-PMS2P11	PLEKHO2	0.722261	4.49e-06
SNX29P2	RRAGD	0.721819	4.58e-06
POLR2J4	BAZ2B	0.721737	4.6e-06
AC074212	PLXND1	0.721604	4.63e-06
ZNF213-AS1	PPARG	0.721306	4.69e-06
HCG18	BAZ2B	0.721304	4.69e-06
SNX29P2	CPEB3	0.721284	4.69e-06
RFPL3S	FOXJ2	0.721281	4.69e-06
LINC00342	DLG5	0.721168	4.72e-06
THAP9-AS1	POGZ	0.721048	4.74e-06
RPARP-AS1	CRY2	0.721027	4.75e-06
KLF3-AS1	NUP43	0.72093	4.77e-06
SNX29P2	BHLHB9	0.720834	4.79e-06
ADD3-AS1	RGS2	0.720722	4.81e-06
RFPL3S	CRY2	0.72067	4.82e-06
RPARP-AS1	RRAGD	0.720597	4.84e-06
CTC-338M12	HNRNPD	0.720472	4.87e-06
HCG18	RFX7	0.720239	4.92e-06
RFPL3S	MED13	0.720194	4.93e-06
RFPL3S	CENPQ	0.720092	4.95e-06
DLEU2	CHD9	0.720062	4.96e-06
KLF3-AS1	RRAGD	0.719953	4.98e-06
AC074212	ESRRA	0.719529	5.08e-06
SND1-IT1	LIFR	0.719445	5.09e-06
HCG18	SESN1	0.719426	5.1e-06
ADD3-AS1	LONRF1	0.71924	5.14e-06
RPARP-AS1	SIKE1	0.71908	5.18e-06
CTC-338M12	CEP192	0.718919	5.22e-06
KLF3-AS1	U2SURP	0.718764	5.25e-06
POLR2J4	ANKH	0.718415	5.33e-06
LINC00115	SMAD5	0.718267	5.37e-06
LINC00115	S1PR1	0.718004	5.43e-06
SNX29P2	MSANTD2	0.717897	5.46e-06
LINC00342	MSANTD2	0.71783	5.47e-06
THAP9-AS1	ASF1A	0.71779	5.48e-06
HLA-F-AS1	TGFBR3	0.71772	5.5e-06
POLR2J4	EXPH5	0.717337	5.59e-06
KLF3-AS1	ATG16L1	0.717298	5.6e-06
RPARP-AS1	MYLIP	0.717291	5.6e-06
HCG18	GEMIN2	0.716957	5.69e-06
SNX29P2	PLS1	0.716953	5.69e-06
SNX29P2	GPBP1L1	0.716744	5.74e-06
HYMAI	U2SURP	0.716668	5.76e-06
LINC00894	TGFBR3	0.716654	5.76e-06
SNX29P2	PRKAA1	0.716513	5.8e-06
CTC-338M12	KRAS	0.716326	5.85e-06
KLF3-AS1	RGS2	0.716247	5.87e-06
HYMAI	ATG14	0.716244	5.87e-06
SND1-IT1	NR3C2	0.716104	5.91e-06
THAP9-AS1	SNRK	0.716038	5.92e-06
HYMAI	RFX7	0.715964	5.94e-06
HCG18	OXR1	0.715885	5.96e-06
KLF3-AS1	TBC1D8	0.715694	6.01e-06
HCG18	CLCC1	0.71564	6.03e-06
RPARP-AS1	HOXC6	0.71554	6.05e-06
SND1-IT1	LONRF1	0.715469	6.07e-06
LINC00342	CADM1	0.715379	6.1e-06
RFPL3S	GOLGA8A	0.715276	6.12e-06
KLF3-AS1	SCML1	0.715168	6.15e-06
HLA-F-AS1	TOB1	0.715156	6.16e-06
SND1-IT1	POGZ	0.715146	6.16e-06
HCG9	E2F1	0.715102	6.17e-06
CTC-338M12	MED1	0.715059	6.18e-06
RFPL3S	CDC42SE1	0.714876	6.23e-06
LINC00342	PDS5B	0.714827	6.24e-06
HLA-F-AS1	CPEB3	0.714749	6.27e-06
POLR2J4	EPM2AIP1	0.71473	6.27e-06
POLR2J4	HIVEP1	0.71462	6.3e-06
LINC00894	VPS13C	0.714545	6.32e-06
CTC-338M12	SNRK	0.71447	6.34e-06
THAP9-AS1	TRIM36	0.714337	6.38e-06
KLF3-AS1	SESN1	0.714321	6.38e-06
POLR2J4	BHLHB9	0.714282	6.39e-06
SND1-IT1	YTHDC1	0.714235	6.41e-06
HCG18	U2SURP	0.714168	6.43e-06
ZNF213-AS1	SEMA6D	0.714163	6.43e-06
CTC-338M12	REV3L	0.714004	6.47e-06
HCG18	COX20	0.713917	6.5e-06
LINC00115	SIKE1	0.713745	6.55e-06
HYMAI	ERAP1	0.71334	6.66e-06
RFPL3S	EXPH5	0.712592	6.88e-06
CTC-338M12	NR3C2	0.712533	6.9e-06
RFPL3S	ACSL4	0.712507	6.91e-06
SNX29P2	CCND1	0.712452	6.92e-06
HCG18	CCNJ	0.712323	6.96e-06
HYMAI	BAZ2B	0.712124	7.02e-06
DLEU2	KLHL20	0.712108	7.03e-06
DLEU2	YTHDC1	0.712009	7.06e-06
LINC00894	GOLGA8A	0.711807	7.12e-06
LINC00894	TAOK1	0.71172	7.15e-06
ADD3-AS1	KLHL20	0.711569	7.19e-06
CTC-338M12	CEP57	0.711568	7.19e-06
SNX29P2	PER2	0.711566	7.19e-06
THAP9-AS1	DCK	0.711518	7.21e-06
HYMAI	RRAGD	0.711342	7.26e-06
ADD3-AS1	NPAT	0.711282	7.28e-06
LINC00342	ACSL4	0.711149	7.32e-06
CTC-338M12	S1PR1	0.711099	7.34e-06
SNX29P2	YTHDF3	0.710972	7.38e-06
SNX29P2	AGO4	0.710963	7.38e-06
POLR2J4	OXR1	0.71096	7.38e-06
CTC-338M12	AKAP11	0.710615	7.49e-06
KLF3-AS1	HNRNPD	0.710438	7.55e-06
AC074212	FLOT2	0.710429	7.55e-06
HYMAI	CENPQ	0.710393	7.56e-06
HCG18	RRAGD	0.710277	7.6e-06
KLF3-AS1	INPP5A	0.710135	7.65e-06
RPARP-AS1	BCL7A	0.710036	7.68e-06
HYMAI	ATG16L1	0.709983	7.7e-06
HLA-F-AS1	SEMA6D	0.709884	7.73e-06
LINC00115	FRAT2	0.709831	7.75e-06
KLF3-AS1	ARNTL	0.709633	7.81e-06
HCG18	TBC1D8	0.709622	7.82e-06
HYMAI	HNRNPDL	0.709591	7.83e-06
ADD3-AS1	NUP43	0.709536	7.85e-06
LINC00342	ZMYM2	0.709518	7.85e-06
THAP9-AS1	GEMIN2	0.70939	7.9e-06
SND1-IT1	TAOK1	0.709372	7.9e-06
AC074212	C1S	0.709336	7.91e-06
CTC-338M12	KLHL20	0.709318	7.92e-06
ANKRD10-IT1	UBE2H	0.709265	7.94e-06
CTC-338M12	EEA1	0.709249	7.94e-06
LINC00894	PPARG	0.709124	7.99e-06
HLA-F-AS1	EMP2	0.709012	8.02e-06
RPARP-AS1	CENPQ	0.708795	8.1e-06
KLF3-AS1	NCOA2	0.708391	8.24e-06
SNX29P2	FRAT2	0.708074	8.35e-06
CTC-338M12	CHD9	0.708033	8.36e-06
ADD3-AS1	PER2	0.707367	8.6e-06
SND1-IT1	CRY2	0.70708	8.71e-06
CTC-338M12	NUP43	0.706843	8.8e-06
THAP9-AS1	VPS13C	0.706772	8.82e-06
RPARP-AS1	ZNF107	0.70667	8.86e-06
POLR2J4	BCOR	0.706653	8.87e-06
HYMAI	HIVEP1	0.70664	8.87e-06
RFPL3S	TOB1	0.706539	8.91e-06
RPARP-AS1	COX20	0.706454	8.94e-06
CTC-338M12	FMR1	0.706374	8.97e-06
RFPL3S	AMOTL2	0.706285	9.01e-06
DKFZP434A062	CNN2	0.706261	9.02e-06
RFPL3S	PDS5B	0.70623	9.03e-06
HCG18	SCML1	0.706149	9.06e-06
LINC00342	NR3C2	0.705827	9.18e-06
RPARP-AS1	ANKH	0.705597	9.27e-06
SNX29P2	PPAT	0.705589	9.27e-06
CTC-338M12	ANKH	0.705348	9.37e-06
THAP9-AS1	BRWD1	0.705328	9.38e-06
THAP9-AS1	REV3L	0.705275	9.4e-06
LINC00342	TRIM36	0.705265	9.4e-06
RFPL3S	TULP4	0.705195	9.43e-06
CTC-338M12	EXPH5	0.705019	9.5e-06
ADD3-AS1	RBM12B	0.704916	9.54e-06
SNX29P2	ZNF107	0.704846	9.57e-06
RPARP-AS1	RBL1	0.704287	9.79e-06
DLEU2	ARID4B	0.7042	9.83e-06
LINC00115	ZBTB18	0.704096	9.87e-06
HCG18	HNRNPD	0.70373	1e-05
HCG9	ITGA2	0.703662	1.01e-05
SNX29P2	PKD2	0.703634	1.01e-05
THAP9-AS1	CDC42SE1	0.703545	1.01e-05
ANKRD10-IT1	ITGA2	0.703252	1.02e-05
POLR2J4	PPAT	0.703249	1.02e-05
CTC-338M12	ZCCHC2	0.703168	1.03e-05
HCG18	PKD2	0.703045	1.03e-05
DTX2P1-UPK3BP1-PMS2P11	SZRD1	0.703019	1.03e-05
DLEU2	ACSL4	0.703017	1.03e-05
RPARP-AS1	CHD9	0.702857	1.04e-05
RFPL3S	SIK1	0.702585	1.05e-05
RPARP-AS1	NFAT5	0.702474	1.06e-05
RPARP-AS1	AGO4	0.702265	1.07e-05
CTC-338M12	SCML1	0.702254	1.07e-05
LINC00894	SNRK	0.702157	1.07e-05
SND1-IT1	NPAT	0.701963	1.08e-05
LINC00115	ARNTL	0.701544	1.1e-05
RFPL3S	RGS2	0.701534	1.1e-05
POLR2J4	GSE1	0.701512	1.1e-05
DTX2P1-UPK3BP1-PMS2P11	LFNG	0.701503	1.1e-05
HYMAI	GEMIN2	0.701409	1.1e-05
POLR2J4	ZNF217	0.701343	1.11e-05
POLR2J4	HNRNPDL	0.701241	1.11e-05
HYMAI	CPEB3	0.701159	1.12e-05
CTC-338M12	TRIM36	0.701006	1.12e-05
LINC00342	ETV6	0.700976	1.12e-05
POLR2J4	MSANTD2	0.700664	1.14e-05
KLF3-AS1	TAOK1	0.700169	1.16e-05
CTC-338M12	SIKE1	0.700009	1.17e-05
*Pearson correlation coefficient

## Sheet: Sheet1
				Var1	Var2	cor	p_value								HCG18	FOS	0.408977	0.0223448
CTC-338M12	lncRNA			CTC-338M12	AGO4	0.579356	0.000637261			AGO4	mRNA				POLR2J4	FOS	0.418164	0.0192333
HCG18	lncRNA			HCG18	AGO4	0.686599	2e-05			CCND1	mRNA				SNX29P2	FOS	0.371056	0.0398722
HLA-F-AS1	lncRNA			HLA-F-AS1	AGO4	0.628291	0.00015398			CUL3	mRNA
POLR2J4	lncRNA			POLR2J4	AGO4	0.613918	0.000239451			ETV6	mRNA
SNX29P2	lncRNA			SNX29P2	AGO4	0.633724	0.000129564			EZH2	mRNA				EIF4EBP1	mRNA
				CTC-338M12	CCND1	0.51323	0.00315055			FOXO1	mRNA				ETS1	mRNA
				HCG18	CCND1	0.685665	2.07e-05			KLHL20	mRNA				PXN	mRNA
				HLA-F-AS1	CCND1	0.659756	5.4e-05			LONRF1	mRNA				RPS6KA1	mRNA
				POLR2J4	CCND1	0.651969	7.08e-05			MYLIP	mRNA				STAT3	mRNA
				SNX29P2	CCND1	0.682725	2.32e-05			TNRC6B	mRNA
				CTC-338M12	CUL3	0.626511	0.000162829			TRIM36	mRNA
				HCG18	CUL3	0.551426	0.00130285
				HLA-F-AS1	CUL3	0.504186	0.00382734
				POLR2J4	CUL3	0.598324	0.000377588
				SNX29P2	CUL3	0.752752	1.03e-06
				CTC-338M12	ETV6	0.506066	0.00367714
				HCG18	ETV6	0.719878	5e-06
				POLR2J4	ETV6	0.790113	1.25e-07
				SNX29P2	ETV6	0.759216	7.37e-07
				CTC-338M12	EZH2	0.662899	4.83e-05
				HCG18	EZH2	0.6339	0.000128833
				HLA-F-AS1	EZH2	0.408436	0.0225402
				POLR2J4	EZH2	0.515448	0.0030013
				SNX29P2	EZH2	0.611276	0.000259097
				CTC-338M12	FOXO1	0.394648	0.0280162
				HCG18	FOXO1	0.41953	0.0188027
				HLA-F-AS1	FOXO1	0.665765	4.36e-05
				SNX29P2	FOXO1	0.431035	0.0154845
				CTC-338M12	KLHL20	0.703458	1.01e-05
				HCG18	KLHL20	0.870217	2.03e-10
				HLA-F-AS1	KLHL20	0.585618	0.000538038
				POLR2J4	KLHL20	0.877591	9.12e-11
				SNX29P2	KLHL20	0.872318	1.62e-10
				CTC-338M12	LONRF1	0.738461	2.11e-06
				HCG18	LONRF1	0.81602	2.21e-08
				HLA-F-AS1	LONRF1	0.72787	3.48e-06
				POLR2J4	LONRF1	0.773367	3.38e-07
				SNX29P2	LONRF1	0.804178	5.04e-08
				CTC-338M12	MYLIP	0.635898	0.000120805
				HCG18	MYLIP	0.68639	2.02e-05
				HLA-F-AS1	MYLIP	0.588349	0.000499226
				POLR2J4	MYLIP	0.656963	5.96e-05
				SNX29P2	MYLIP	0.756681	8.43e-07
				CTC-338M12	TNRC6B	0.467157	0.00805875
				HCG18	TNRC6B	0.701018	1.12e-05
				POLR2J4	TNRC6B	0.740705	1.89e-06
				SNX29P2	TNRC6B	0.793437	1.01e-07
				CTC-338M12	TRIM36	0.663633	4.71e-05
				HCG18	TRIM36	0.719716	5.03e-06
				HLA-F-AS1	TRIM36	0.397084	0.0269767
				POLR2J4	TRIM36	0.76618	5.06e-07
				SNX29P2	TRIM36	0.746701	1.41e-06
