# Supplementary material for: Identifying an lncRNA-Related ceRNA Network to Reveal Novel Targets for a Cutaneous Squamous Cell Carcinoma
Source: Biology (Basel). 2021 May 13;10(5):432. doi: 10.3390/biology10050432 (PMC8152267; doi:10.3390/biology10050432)
Supplement: Supplementary file 1 [file biology-10-00432-s001.zip › Table S2. DElncRNAs-miRNAs pairs of ceRNA network.xlsx]

## Sheet: Sheet2
Table S2. DElncRNAs-miRNAs pairs of ceRNA network
lncRNA	miRNA
HCG9	hsa-miR-137
POLR2J4	hsa-miR-137
HLA-F-AS1	hsa-miR-137
HCG18	hsa-miR-137
DLEU2	hsa-miR-137
HCG9	hsa-miR-140-5p
AC074212	hsa-miR-140-5p
SNX29P2	hsa-miR-140-5p
POLR2J4	hsa-miR-140-5p
HCG9	hsa-miR-1244
AC074212	hsa-miR-1244
SNX29P2	hsa-miR-1244
POLR2J4	hsa-miR-1244
HCG9	hsa-miR-142-3p
SNX29P2	hsa-miR-142-3p
POLR2J4	hsa-miR-142-3p
HCG18	hsa-miR-142-3p
LINC00342	hsa-miR-142-3p
HCG9	hsa-miR-125a-5p
AC074212	hsa-miR-125a-5p
SNX29P2	hsa-miR-125a-5p
POLR2J4	hsa-miR-125a-5p
LINC00115	hsa-miR-125a-5p
CTC-338M12	hsa-miR-125a-5p
HCG9	hsa-miR-125b-5p
AC074212	hsa-miR-125b-5p
SNX29P2	hsa-miR-125b-5p
POLR2J4	hsa-miR-125b-5p
LINC00115	hsa-miR-125b-5p
CTC-338M12	hsa-miR-125b-5p
ANKRD10-IT1	hsa-miR-24-3p
SNX29P2	hsa-miR-24-3p
HLA-F-AS1	hsa-miR-24-3p
HCG18	hsa-miR-24-3p
CTC-338M12	hsa-miR-24-3p
ANKRD10-IT1	hsa-miR-129-5p
SNX29P2	hsa-miR-129-5p
HLA-F-AS1	hsa-miR-129-5p
HCG18	hsa-miR-129-5p
DLEU2	hsa-miR-129-5p
LINC00342	hsa-miR-129-5p
CTC-338M12	hsa-miR-129-5p
AC074212	hsa-miR-217
SNX29P2	hsa-miR-217
HLA-F-AS1	hsa-miR-217
HCG18	hsa-miR-217
LINC00342	hsa-miR-217
CTC-338M12	hsa-miR-217
AC074212	hsa-miR-27a-3p
SNX29P2	hsa-miR-27a-3p
POLR2J4	hsa-miR-27a-3p
HLA-F-AS1	hsa-miR-27a-3p
HCG18	hsa-miR-27a-3p
LINC00342	hsa-miR-27a-3p
CTC-338M12	hsa-miR-27a-3p
AC074212	hsa-miR-761
SNX29P2	hsa-miR-761
POLR2J4	hsa-miR-761
HLA-F-AS1	hsa-miR-761
HCG18	hsa-miR-761
DLEU2	hsa-miR-761
LINC00342	hsa-miR-761
CTC-338M12	hsa-miR-761
AC074212	hsa-miR-3619-5p
SNX29P2	hsa-miR-3619-5p
POLR2J4	hsa-miR-3619-5p
HLA-F-AS1	hsa-miR-3619-5p
HCG18	hsa-miR-3619-5p
DLEU2	hsa-miR-3619-5p
LINC00342	hsa-miR-3619-5p
CTC-338M12	hsa-miR-3619-5p
SNX29P2	hsa-miR-301b-3p
HCG18	hsa-miR-301b-3p
SNX29P2	hsa-miR-507
HLA-F-AS1	hsa-miR-507
DLEU2	hsa-miR-507
CTC-338M12	hsa-miR-507
SNX29P2	hsa-miR-17-5p
POLR2J4	hsa-miR-17-5p
HLA-F-AS1	hsa-miR-17-5p
HCG18	hsa-miR-17-5p
SNX29P2	hsa-miR-20b-5p
POLR2J4	hsa-miR-20b-5p
HLA-F-AS1	hsa-miR-20b-5p
HCG18	hsa-miR-20b-5p
SNX29P2	hsa-miR-193a-3p
POLR2J4	hsa-miR-193a-3p
HLA-F-AS1	hsa-miR-193a-3p
HCG18	hsa-miR-193a-3p
LINC00342	hsa-miR-193a-3p
CTC-338M12	hsa-miR-193a-3p
SNX29P2	hsa-miR-206
POLR2J4	hsa-miR-206
HCG18	hsa-miR-206
DLEU2	hsa-miR-206
CTC-338M12	hsa-miR-206
SNX29P2	hsa-miR-22-3p
POLR2J4	hsa-miR-22-3p
HLA-F-AS1	hsa-miR-22-3p
HCG18	hsa-miR-22-3p
SNX29P2	hsa-miR-23b-3p
HLA-F-AS1	hsa-miR-23b-3p
HCG18	hsa-miR-23b-3p
DLEU2	hsa-miR-23b-3p
SNX29P2	hsa-miR-363-3p
POLR2J4	hsa-miR-363-3p
HLA-F-AS1	hsa-miR-363-3p
HCG18	hsa-miR-363-3p
DLEU2	hsa-miR-363-3p
CTC-338M12	hsa-miR-363-3p
SNX29P2	hsa-miR-107
POLR2J4	hsa-miR-107
HLA-F-AS1	hsa-miR-107
HCG18	hsa-miR-107
CTC-338M12	hsa-miR-107
SNX29P2	hsa-miR-425-5p
POLR2J4	hsa-miR-425-5p
HLA-F-AS1	hsa-miR-425-5p
SNX29P2	hsa-miR-10a-5p
POLR2J4	hsa-miR-10a-5p
SNX29P2	hsa-miR-455-5p
HLA-F-AS1	hsa-miR-455-5p
POLR2J4	hsa-miR-590-5p
HLA-F-AS1	hsa-miR-590-5p
DLEU2	hsa-miR-590-5p
POLR2J4	hsa-miR-1297
LINC00115	hsa-miR-212-3p
HCG18	hsa-miR-212-3p
CTC-338M12	hsa-miR-212-3p
LINC00115	hsa-miR-146b-5p
HCG18	hsa-miR-146b-5p
LINC00342	hsa-miR-146b-5p
CTC-338M12	hsa-miR-146b-5p
HCG18	hsa-miR-135a-5p
CTC-338M12	hsa-miR-135a-5p
LINC00342	hsa-miR-490-3p
CTC-338M12	hsa-miR-490-3p
