# Supplementary material for: Identifying an lncRNA-Related ceRNA Network to Reveal Novel Targets for a Cutaneous Squamous Cell Carcinoma
Source: Biology (Basel). 2021 May 13;10(5):432. doi: 10.3390/biology10050432 (PMC8152267; doi:10.3390/biology10050432)
Supplement: Supplementary file 1 [file biology-10-00432-s001.zip › Table S3. DEmRNAs-miRNAs pairs of ceRNA network.xlsx]

## Sheet: Sheet1
Table S3. DEmRNAs-miRNAs pairs of ceRNA network
miRNA	mRNA
hsa-miR-212-3p	BRWD1
hsa-miR-212-3p	ASF1A
hsa-miR-301b-3p	BRWD1
hsa-miR-301b-3p	ACSL4
hsa-miR-301b-3p	SIK1
hsa-miR-301b-3p	ZBTB18
hsa-miR-301b-3p	RRAGD
hsa-miR-301b-3p	PRKAA1
hsa-miR-301b-3p	SECISBP2L
hsa-miR-301b-3p	DLG5
hsa-miR-301b-3p	BTBD3
hsa-miR-301b-3p	PIGA
hsa-miR-301b-3p	MBNL3
hsa-miR-301b-3p	RAB14
hsa-miR-301b-3p	RFX7
hsa-miR-23b-3p	BRWD1
hsa-miR-23b-3p	PRR14L
hsa-miR-23b-3p	HMGB2
hsa-miR-23b-3p	ZMYM2
hsa-miR-23b-3p	SEMA6D
hsa-miR-23b-3p	CNN2
hsa-miR-23b-3p	ZCCHC2
hsa-miR-17-5p	ACSL4
hsa-miR-17-5p	PRR14L
hsa-miR-17-5p	SIK1
hsa-miR-17-5p	ANKH
hsa-miR-17-5p	NPAT
hsa-miR-17-5p	SMAD5
hsa-miR-17-5p	ZBTB18
hsa-miR-17-5p	RBM12B
hsa-miR-17-5p	PLS1
hsa-miR-17-5p	TNKS2
hsa-miR-17-5p	RBL1
hsa-miR-17-5p	KLHL20
hsa-miR-17-5p	RAPGEF4
hsa-miR-17-5p	U2SURP
hsa-miR-17-5p	RRAGD
hsa-miR-17-5p	TOPORS
hsa-miR-17-5p	SIKE1
hsa-miR-17-5p	ATG16L1
hsa-miR-17-5p	KLF10
hsa-miR-17-5p	CHD9
hsa-miR-17-5p	VPS13C
hsa-miR-17-5p	ZNF107
hsa-miR-17-5p	OXR1
hsa-miR-17-5p	ATG14
hsa-miR-17-5p	CCND1
hsa-miR-17-5p	CENPQ
hsa-miR-17-5p	EZH1
hsa-miR-17-5p	STK11
hsa-miR-17-5p	ERAP1
hsa-miR-17-5p	EEA1
hsa-miR-17-5p	NFAT5
hsa-miR-17-5p	FOXJ2
hsa-miR-17-5p	ARID4B
hsa-miR-17-5p	RBL2
hsa-miR-17-5p	MAP3K8
hsa-miR-17-5p	PLEKHO2
hsa-miR-17-5p	CEP57
hsa-miR-17-5p	E2F1
hsa-miR-17-5p	PKD2
hsa-miR-17-5p	CRY2
hsa-miR-17-5p	ANKRD12
hsa-miR-17-5p	NRIP3
hsa-miR-17-5p	AKAP11
hsa-miR-129-5p	ACSL4
hsa-miR-129-5p	FMR1
hsa-miR-129-5p	HBS1L
hsa-miR-129-5p	ADD3
hsa-miR-129-5p	ETV6
hsa-miR-129-5p	LRRC2
hsa-miR-129-5p	HNRNPA3
hsa-miR-129-5p	RSBN1
hsa-miR-129-5p	EXPH5
hsa-miR-129-5p	C1S
hsa-miR-20b-5p	ACSL4
hsa-miR-20b-5p	PRR14L
hsa-miR-20b-5p	SIK1
hsa-miR-20b-5p	ANKH
hsa-miR-20b-5p	NPAT
hsa-miR-20b-5p	SMAD5
hsa-miR-20b-5p	ZBTB18
hsa-miR-20b-5p	PLS1
hsa-miR-20b-5p	TNKS2
hsa-miR-20b-5p	KLHL20
hsa-miR-20b-5p	RAPGEF4
hsa-miR-20b-5p	U2SURP
hsa-miR-20b-5p	RRAGD
hsa-miR-20b-5p	TOPORS
hsa-miR-20b-5p	ATG16L1
hsa-miR-20b-5p	KLF10
hsa-miR-20b-5p	CHD9
hsa-miR-20b-5p	VPS13C
hsa-miR-20b-5p	OXR1
hsa-miR-20b-5p	ATG14
hsa-miR-20b-5p	CCND1
hsa-miR-20b-5p	CENPQ
hsa-miR-20b-5p	EZH1
hsa-miR-20b-5p	EEA1
hsa-miR-20b-5p	NFAT5
hsa-miR-20b-5p	FOXJ2
hsa-miR-20b-5p	ARID4B
hsa-miR-20b-5p	PLEKHO2
hsa-miR-20b-5p	CEP57
hsa-miR-20b-5p	E2F1
hsa-miR-20b-5p	CRY2
hsa-miR-20b-5p	ANKRD12
hsa-miR-20b-5p	NRIP3
hsa-miR-142-3p	ACSL4
hsa-miR-142-3p	SIK1
hsa-miR-142-3p	CCNT2
hsa-miR-142-3p	TAOK1
hsa-miR-142-3p	EPM2AIP1
hsa-miR-142-3p	ZNF217
hsa-miR-142-3p	CEP192
hsa-miR-142-3p	INPP5A
hsa-miR-142-3p	ARNTL
hsa-miR-142-3p	AFF1
hsa-miR-590-5p	PER2
hsa-miR-24-3p	PER2
hsa-miR-24-3p	BCL7A
hsa-miR-24-3p	TAOK1
hsa-miR-24-3p	PIM2
hsa-miR-24-3p	ZNF217
hsa-miR-24-3p	AMOTL2
hsa-miR-24-3p	PTPN9
hsa-miR-24-3p	POGZ
hsa-miR-24-3p	SESN1
hsa-miR-24-3p	SCML1
hsa-miR-24-3p	RNF2
hsa-miR-24-3p	EMP2
hsa-miR-363-3p	PER2
hsa-miR-363-3p	TRIM36
hsa-miR-363-3p	NUP43
hsa-miR-363-3p	TULP4
hsa-miR-363-3p	TOB1
hsa-miR-363-3p	MYLIP
hsa-miR-363-3p	HIVEP1
hsa-miR-363-3p	C11orf24
hsa-miR-363-3p	CPEB3
hsa-miR-363-3p	GPBP1L1
hsa-miR-363-3p	RSBN1
hsa-miR-363-3p	GOLGA8A
hsa-miR-363-3p	BAZ2B
hsa-miR-363-3p	TBC1D8
hsa-miR-363-3p	REV3L
hsa-miR-363-3p	S1PR1
hsa-miR-363-3p	GEMIN2
hsa-miR-363-3p	COX20
hsa-miR-1297	SFPQ
hsa-miR-1297	CHAC1
hsa-miR-1297	TNRC6B
hsa-miR-1297	ZBTB18
hsa-miR-1297	TOB1
hsa-miR-1297	UBE2H
hsa-miR-1297	FRAT2
hsa-miR-1297	WNK1
hsa-miR-125a-5p	ESRRA
hsa-miR-125a-5p	ARID3B
hsa-miR-125a-5p	LFNG
hsa-miR-137	ESRRA
hsa-miR-137	AGO4
hsa-miR-137	HNRNPDL
hsa-miR-137	SNRK
hsa-miR-137	YTHDF3
hsa-miR-137	NCOA2
hsa-miR-193a-3p	KRAS
hsa-miR-193a-3p	MSANTD2
hsa-miR-193a-3p	INO80D
hsa-miR-206	KRAS
hsa-miR-217	KRAS
hsa-miR-217	SIRT1
hsa-miR-135a-5p	SMAD5
hsa-miR-135a-5p	NR3C2
hsa-miR-507	BCL7A
hsa-miR-507	CCNT2
hsa-miR-107	PNISR
hsa-miR-107	POLD3
hsa-miR-107	TARBP2
hsa-miR-107	CPEB3
hsa-miR-107	CNNM2
hsa-miR-107	YTHDC1
hsa-miR-107	TGFBR3
hsa-miR-107	PHKA1
hsa-miR-107	ITGA2
hsa-miR-22-3p	RGS2
hsa-miR-22-3p	CHD9
hsa-miR-22-3p	FRAT2
hsa-miR-27a-3p	TAOK1
hsa-miR-27a-3p	GSE1
hsa-miR-27a-3p	MED13
hsa-miR-27a-3p	NF1
hsa-miR-27a-3p	MBTD1
hsa-miR-27a-3p	HOXC6
hsa-miR-27a-3p	PPARG
hsa-miR-27a-3p	LONRF1
hsa-miR-27a-3p	SPRY2
hsa-miR-27a-3p	SZRD1
hsa-miR-27a-3p	TGFBR3
hsa-miR-27a-3p	LIFR
hsa-miR-27a-3p	PLXND1
hsa-miR-27a-3p	PDS5B
hsa-miR-125b-5p	ARID3B
hsa-miR-125b-5p	ETS1
hsa-miR-125b-5p	PPAT
hsa-miR-125b-5p	IKZF4
hsa-miR-125b-5p	CCNJ
hsa-miR-455-5p	MYLIP
hsa-miR-140-5p	MED13
hsa-miR-146b-5p	TRAF6
hsa-miR-146b-5p	HNRNPD
hsa-miR-1244	DCK
hsa-miR-490-3p	CLCC1
hsa-miR-761	CDC42SE1
hsa-miR-761	FLOT2
hsa-miR-3619-5p	CDC42SE1
hsa-miR-3619-5p	FLOT2
hsa-miR-10a-5p	MED1
hsa-miR-10a-5p	CADM1
hsa-miR-425-5p	BHLHB9
hsa-miR-425-5p	BCOR
