# Supplementary material for: Identifying an lncRNA-Related ceRNA Network to Reveal Novel Targets for a Cutaneous Squamous Cell Carcinoma
Source: Biology (Basel). 2021 May 13;10(5):432. doi: 10.3390/biology10050432 (PMC8152267; doi:10.3390/biology10050432)
Supplement: Supplementary file 1 [file biology-10-00432-s001.zip › Table S4. Over-expressed and down-expresed lncRNAs of ceRNA network.xlsx]

## Sheet: Sheet1
Table S4. Over-expressed and down-expresed lncRNAs of ceRNA network
lncRNA	log2FC	P.Value	FDR	Up or down regulated
HCG18	-1.91322	4.59e-07	1.1e-05	down
LINC00342	-1.81322	2.84e-06	4.06e-05	down
HLA-F-AS1	-1.3811	7.06e-09	5.7e-07	down
SNX29P2	-1.00697	6.03e-07	1.33e-05	down
POLR2J4	-0.981755	3.08e-05	0.00025223	down
CTC-338M12	-0.926845	5.04e-06	6.33e-05	down
LINC00115	-0.867861	7.9e-05	0.000520015	down
DLEU2	-0.73644	0.00329194	0.0096947	down
AC074212	0.596625	2.48e-07	7e-06	up
HCG9	0.650043	4.08e-06	5.39e-05	up
ANKRD10-IT1	1.62458	5.84e-05	0.000412858	up
