# Supplementary material for: Identifying an lncRNA-Related ceRNA Network to Reveal Novel Targets for a Cutaneous Squamous Cell Carcinoma
Source: Biology (Basel). 2021 May 13;10(5):432. doi: 10.3390/biology10050432 (PMC8152267; doi:10.3390/biology10050432)
Supplement: Supplementary file 1 [file biology-10-00432-s001.zip › Table S5. Over-expressed and down-expresed mRNAs of ceRNA network.xlsx]

## Sheet: Sheet1
Table S5. Over-expressed and down-expresed mRNAs of ceRNA network
mRNA	log2FC	P-value	FDR	Up or down regulated
LONRF1	-2.5662	6.95e-08	2.72e-06	down
TGFBR3	-1.95079	4.37e-05	0.000331904	down
NR3C2	-1.90421	3.33e-10	7.68e-08	down
RGS2	-1.83695	1e-07	3.52e-06	down
HOXC6	-1.81346	4.82e-06	6.12e-05	down
CRY2	-1.80508	4.7e-07	1.12e-05	down
MAP3K8	-1.79576	8.53e-07	1.71e-05	down
AMOTL2	-1.67263	1.85e-06	2.96e-05	down
SIRT1	-1.63674	1.43e-06	2.43e-05	down
CCND1	-1.61268	6.67e-06	7.79e-05	down
RAPGEF4	-1.59949	0.000324523	0.00154796	down
SIK1	-1.59676	1.85e-06	2.96e-05	down
RRAGD	-1.56688	7.1e-06	8.17e-05	down
PLS1	-1.52372	7.78e-05	0.000513984	down
ZNF107	-1.51173	1.17e-05	0.000118991	down
SESN1	-1.49932	4.25e-08	1.91e-06	down
SMAD5	-1.48361	4.36e-06	5.68e-05	down
MSANTD2	-1.44872	0.00170504	0.00572226	down
MYLIP	-1.44197	0.000183761	0.000981921	down
ADD3	-1.40413	0.000125728	0.000737221	down
SECISBP2L	-1.39424	2.52e-06	3.68e-05	down
EMP2	-1.38624	3.75e-07	9.5e-06	down
GOLGA8A	-1.38539	1.14e-05	0.000117212	down
SNRK	-1.36537	1.66e-05	0.000154746	down
SPRY2	-1.36455	3.91e-05	0.000305042	down
EXPH5	-1.33984	1.11e-05	0.000114732	down
TULP4	-1.3204	1.54e-07	4.83e-06	down
YTHDC1	-1.30758	1.18e-06	2.12e-05	down
AGO4	-1.29505	6.83e-07	1.46e-05	down
SCML1	-1.29391	0.000484588	0.00210979	down
RSBN1	-1.26573	0.000111454	0.000671404	down
OXR1	-1.24394	0.00759925	0.0192052	down
RBM12B	-1.24075	3.31e-05	0.00026765	down
ANKH	-1.23945	1.45e-09	1.86e-07	down
ACSL4	-1.21035	6.89e-05	0.000469222	down
TOB1	-1.20982	1.49e-06	2.51e-05	down
MBTD1	-1.20413	4.15e-07	1.03e-05	down
BTBD3	-1.20143	2.05e-05	0.000184673	down
ZCCHC2	-1.17597	0.000274004	0.00135075	down
CENPQ	-1.16996	9.82e-06	0.000104411	down
NUP43	-1.15959	1.98e-06	3.08e-05	down
INPP5A	-1.15482	3.35e-07	8.84e-06	down
EZH1	-1.15148	2.78e-08	1.45e-06	down
FRAT2	-1.14916	7.47e-06	8.46e-05	down
EPM2AIP1	-1.14423	0.000118881	0.000706936	down
BHLHB9	-1.14195	3.5e-05	0.000279584	down
HMGB2	-1.11926	5.54e-05	0.000397535	down
PKD2	-1.10878	0.000805551	0.0031676	down
RBL1	-1.0836	0.000167875	0.000918284	down
HIVEP1	-1.06478	0.000450034	0.00199026	down
SFPQ	-1.06449	9.5e-06	0.000101909	down
CHD9	-1.06048	3.83e-08	1.8e-06	down
S1PR1	-1.05812	3.29e-09	3.31e-07	down
BCOR	-1.02816	1.63e-05	0.00015293	down
PER2	-1.02586	1.03e-05	0.000108051	down
RBL2	-1.01578	0.000349457	0.00164425	down
CADM1	-1.00015	0.00216132	0.00687756	down
CPEB3	-0.99767	0.000129788	0.000752961	down
PDS5B	-0.993508	6.61e-05	0.000455573	down
REV3L	-0.985042	4.68e-05	0.000350511	down
TOPORS	-0.984648	0.00178118	0.00590569	down
TNKS2	-0.980026	0.000312199	0.00149949	down
YTHDF3	-0.978192	1.54e-08	9.38e-07	down
GSE1	-0.973725	0.000817227	0.00320236	down
PNISR	-0.971888	0.000317058	0.00151986	down
CDC42SE1	-0.970396	7.33e-08	2.84e-06	down
KLF10	-0.96647	3.39e-07	8.9e-06	down
PIGA	-0.949419	0.000142194	0.000805613	down
ZMYM2	-0.937095	0.000646742	0.00264836	down
BRWD1	-0.936953	3.46e-05	0.000276812	down
PPARG	-0.910709	1.32e-09	1.73e-07	down
RFX7	-0.909204	0.00475882	0.013064	down
MED13	-0.906585	1.63e-06	2.72e-05	down
PRKAA1	-0.903693	0.000508391	0.00219063	down
ATG14	-0.89871	0.000110935	0.00066896	down
NFAT5	-0.895791	0.00102317	0.00383633	down
RNF2	-0.894555	7.98e-08	3.01e-06	down
ASF1A	-0.873248	0.00075766	0.00301859	down
ZBTB18	-0.860245	5.57e-08	2.29e-06	down
PRR14L	-0.84745	9.99e-06	0.000105821	down
ANKRD12	-0.837935	0.000262477	0.0013043	down
GEMIN2	-0.837384	0.00179046	0.00592978	down
DCK	-0.821816	0.000526468	0.00224645	down
ARNTL	-0.81906	0.000228794	0.00116689	down
ZNF217	-0.815346	0.00055082	0.00232509	down
BAZ2B	-0.801865	0.000124409	0.000731483	down
POGZ	-0.797632	4.81e-05	0.000358389	down
GPBP1L1	-0.792406	0.000824169	0.00322466	down
FMR1	-0.787926	0.000359129	0.00167903	down
ERAP1	-0.784219	1.31e-05	0.000129425	down
U2SURP	-0.7842	0.000888236	0.00342078	down
HBS1L	-0.783455	0.00273892	0.00833281	down
RAB14	-0.780671	0.00152797	0.00525397	down
CEP192	-0.768109	0.00346479	0.0101047	down
KLHL20	-0.767886	5.04e-06	6.33e-05	down
HNRNPA3	-0.757596	0.000242531	0.00122438	down
COX20	-0.755813	0.0208676	0.0442965	down
MBNL3	-0.753039	0.00439537	0.0122403	down
POLD3	-0.746486	0.00196378	0.00638879	down
CCNJ	-0.743157	0.00752758	0.0190691	down
DLG5	-0.73126	0.00018666	0.000992013	down
TAOK1	-0.731185	0.000108499	0.000657301	down
CLCC1	-0.723076	0.000472234	0.00206901	down
ATG16L1	-0.712074	0.0144501	0.0327463	down
FOXJ2	-0.711887	1.84e-07	5.5e-06	down
MED1	-0.707809	0.00163174	0.00553644	down
TBC1D8	-0.705846	0.000255786	0.00127728	down
HNRNPDL	-0.703622	0.000141286	0.000802377	down
BCL7A	-0.701524	0.000301077	0.00145737	down
VPS13C	-0.690486	4.76e-05	0.000355181	down
AKAP11	-0.686061	0.00922554	0.0225226	down
PPAT	-0.685578	0.00260167	0.00800342	down
LIFR	-0.678645	8.96e-07	1.76e-05	down
SEMA6D	-0.67703	9.8e-08	3.49e-06	down
WNK1	-0.6708	0.00146066	0.00507533	down
ETV6	-0.668417	0.00774688	0.0195213	down
TNRC6B	-0.668403	0.0130558	0.0301309	down
CEP57	-0.665697	0.000921998	0.00351859	down
ARID4B	-0.665219	4.62e-06	5.94e-05	down
NCOA2	-0.663043	0.00234505	0.00735686	down
EEA1	-0.643124	0.0048103	0.0131789	down
AFF1	-0.642409	0.000514012	0.00220753	down
CCNT2	-0.641436	0.000146814	0.000823582	down
LRRC2	-0.631732	0.000353578	0.00166099	down
TRIM36	-0.630103	0.000384512	0.00176891	down
HNRNPD	-0.618033	0.000155151	0.000860818	down
NPAT	-0.616444	1.01e-05	0.00010667	down
KRAS	-0.596963	0.000286359	0.00140021	down
NF1	-0.592357	4.83e-05	0.000359314	down
SIKE1	-0.591331	0.000774687	0.00306775	down
TRAF6	0.589546	0.0116374	0.0274053	up
ESRRA	0.610106	0.000736941	0.00294601	up
INO80D	0.630588	0.00270219	0.00824234	up
E2F1	0.684593	0.000668164	0.00272	up
CNN2	0.693643	0.000244296	0.0012311	up
CHAC1	0.69417	0.00357778	0.0103596	up
IKZF4	0.696745	3.63e-06	4.91e-05	up
PTPN9	0.71043	0.00315958	0.00937659	up
TARBP2	0.735537	0.000614835	0.002538	up
LFNG	0.740321	2.14e-07	6.25e-06	up
CNNM2	0.741043	0.00307642	0.00917706	up
ETS1	0.760535	4.93e-07	1.16e-05	up
FLOT2	0.793754	1.61e-06	2.69e-05	up
PLXND1	0.854018	1.62e-05	0.000152046	up
ARID3B	0.917656	0.000973358	0.00369067	up
PLEKHO2	0.92535	0.00467512	0.0128672	up
PIM2	0.994671	8.65e-06	9.47e-05	up
STK11	1.00415	2.3e-05	0.000201773	up
SZRD1	1.01497	3.89e-09	3.76e-07	up
UBE2H	1.15291	1.37e-06	2.35e-05	up
NRIP3	1.1912	0.000633066	0.00260461	up
PHKA1	1.19492	3.24e-06	4.47e-05	up
C11orf24	1.3158	4.86e-08	2.08e-06	up
ITGA2	1.41006	2.24e-07	6.43e-06	up
C1S	1.94521	2.75e-05	0.000232175	up
