# Supplementary material for: Identifying an lncRNA-Related ceRNA Network to Reveal Novel Targets for a Cutaneous Squamous Cell Carcinoma
Source: Biology (Basel). 2021 May 13;10(5):432. doi: 10.3390/biology10050432 (PMC8152267; doi:10.3390/biology10050432)
Supplement: Supplementary file 1 [file biology-10-00432-s001.zip › Table S6. GO enrichment terms of DEmRNAs in ceRNA network.xlsx]

## Sheet: Sheet1
Table S6. GO enrichment terms of DEmRNAs in ceRNA network
Category	Term	Count	GeneRatio	P-Value	Genes
GO:0001158	enhancer sequence-specific DNA binding	7/142	119/17697	4.89292e-05	HMGB2/ARNTL/HIVEP1/SFPQ/ARID3B/SIRT1/HOXC6
GO:0035326	enhancer binding	7/142	133/17697	9.90009e-05	HMGB2/ARNTL/HIVEP1/SFPQ/ARID3B/SIRT1/HOXC6
GO:0000980	RNA polymerase II distal enhancer sequence-specific DNA binding	6/142	99/17697	0.000145813	ARNTL/HIVEP1/SFPQ/ARID3B/SIRT1/HOXC6
GO:0030295	protein kinase activator activity	5/142	80/17697	0.000459696	STK11/CCNT2/TAOK1/WNK1/SPRY2
GO:0019887	protein kinase regulator activity	7/142	180/17697	0.000629004	CCND1/STK11/CCNT2/TAOK1/WNK1/SPRY2/CCNJ
GO:0019209	kinase activator activity	5/142	86/17697	0.000640868	STK11/CCNT2/TAOK1/WNK1/SPRY2
GO:0003714	transcription corepressor activity	8/142	238/17697	0.000680017	NPAT/CCND1/EZH1/TOB1/SIRT1/HOXC6/MED1/BCOR
