# Supplementary material for: Identifying an lncRNA-Related ceRNA Network to Reveal Novel Targets for a Cutaneous Squamous Cell Carcinoma
Source: Biology (Basel). 2021 May 13;10(5):432. doi: 10.3390/biology10050432 (PMC8152267; doi:10.3390/biology10050432)
Supplement: Supplementary file 1 [file biology-10-00432-s001.zip › Table S7. KEGG pathway enrichment of DEmRNAs in ceRNA network.xlsx]

## Sheet: Sheet1
Table S7. KEGG pathway enrichment of DEmRNAs in ceRNA network
Category	Term	Count	BgRatio	P_value	Genes
hsa04211	Longevity regulating pathway	6/70	89/8073	0.000112797	PRKAA1/STK11/SESN1/KRAS/SIRT1/PPARG
hsa04068	FoxO signaling pathway	7/70	131/8073	0.00012929	PRKAA1/CCND1/STK11/RBL2/S1PR1/KRAS/SIRT1
hsa04710	Circadian rhythm	4/70	31/8073	0.00013669	PRKAA1/CRY2/ARNTL/PER2
hsa04140	Autophagy - animal	7/70	137/8073	0.000171007	RRAGD/PRKAA1/ATG16L1/ATG14/STK11/KRAS/TRAF6
hsa04218	Cellular senescence	7/70	156/8073	0.000379933	RBL1/CCND1/RBL2/E2F1/KRAS/SIRT1/ETS1
hsa04152	AMPK signaling pathway	6/70	120/8073	0.000574404	PRKAA1/RAB14/CCND1/STK11/SIRT1/PPARG
