# Supplementary material for: Identifying an lncRNA-Related ceRNA Network to Reveal Novel Targets for a Cutaneous Squamous Cell Carcinoma
Source: Biology (Basel). 2021 May 13;10(5):432. doi: 10.3390/biology10050432 (PMC8152267; doi:10.3390/biology10050432)
Supplement: Supplementary file 1 [file biology-10-00432-s001.zip › Table S8. Details of DElncRNAs-miRNAs pairs of core ceRNA network.xlsx]

## Sheet: Sheet1
Table S8. Details of DElncRNAs-miRNAs pairs in ceRNA network
lncRNA	miRNA
HCG9	hsa-miR-137
POLR2J4	hsa-miR-137
HLA-F-AS1	hsa-miR-137
HCG18	hsa-miR-137
DLEU2	hsa-miR-137
HCG9	hsa-miR-125b-5p
AC074212	hsa-miR-125b-5p
SNX29P2	hsa-miR-125b-5p
POLR2J4	hsa-miR-125b-5p
LINC00115	hsa-miR-125b-5p
CTC-338M12	hsa-miR-125b-5p
SNX29P2	hsa-miR-17-5p
POLR2J4	hsa-miR-17-5p
HLA-F-AS1	hsa-miR-17-5p
HCG18	hsa-miR-17-5p
SNX29P2	hsa-miR-20b-5p
POLR2J4	hsa-miR-20b-5p
HLA-F-AS1	hsa-miR-20b-5p
HCG18	hsa-miR-20b-5p
POLR2J4	hsa-miR-1297
