# Supplementary material for: Identifying an lncRNA-Related ceRNA Network to Reveal Novel Targets for a Cutaneous Squamous Cell Carcinoma
Source: Biology (Basel). 2021 May 13;10(5):432. doi: 10.3390/biology10050432 (PMC8152267; doi:10.3390/biology10050432)
Supplement: Supplementary file 1 [file biology-10-00432-s001.zip › Table S9. DEmRNAs-miRNAs pairs of core ceRNA network.xlsx]

## Sheet: Sheet1
Table S9. DEmRNAs-miRNAs pairs of core ceRNA network
miRNA	mRNA
hsa-miR-17-5p	CCND1
hsa-miR-20b-5p	CCND1
hsa-miR-17-5p	E2F1
hsa-miR-20b-5p	E2F1
hsa-miR-1297	TNRC6B
hsa-miR-137	AGO4
hsa-miR-125b-5p	ETS1
